# Supplementary material for: Structure-Guided Design of Therapeutic Antibodies Targeting SARS-CoV-2 Omicron Variants
Source: Research Square preprint supplement (doi:10.21203/rs.3.rs-9917568/v1), 2026-06-24
Supplement: Supplementary file 1 [file 00935e8921f0d3e5e8db047f.xlsx]

## Sheet: BA.1-S 2130WT IgG
	BA.1-S/2130WT IgG Global	BA.1-S/2130WT IgG Local
	(EMD-77299)	(EMD-77298)
		(PDB 35ZO)
Data collection and processing
Magnification	105000	105000
Voltage (kV)	300	300
Electron exposure (e–/Å2)	54.8	54.8
Defocus range (μm)	0.5-2.5	0.5-2.5
Pixel size (Å)	1.054	1.054
Symmetry imposed	C1	C1
Initial particle images (no.)	6547125	6547125
Final particle images (no.)	519737	519737
Map resolution (Å)	2.9	3.2
FSC threshold	0.143	0.143
Refinement
Initial model used (PDB code)		8D8Q
Model resolution (Å)		3.6
FSC threshold		0.5
Map sharpening B factor (Å2)	-79.91	-69.8
Model composition
Non-hydrogen atoms		3453
Protein residues		438
Ligands		NAG: 1
B factors (Å2)
Protein		44.5
Ligand		40.79
R.m.s. deviations
Bond lengths (Å)		0.011 (0)
Bond angles (°)		1.153 (1)
Validation
MolProbity score		0.83
Clashscore		1.18
Poor rotamers (%)		0.81
Ramachandran plot
Favored (%)		98.15
Allowed (%)		1.85
Disallowed (%)		0

## Sheet: BA.1-S 2196WT IgG
	BA.1-S/2196WT IgG Global
	(EMD-77339)
Data collection and processing
Magnification	45000
Voltage (kV)	200
Electron exposure (e–/Å2)	39.4
Defocus range (μm)	0.6-3
Pixel size (Å)	1.12
Symmetry imposed	C1
Initial particle images (no.)	1533009
Final particle images (no.)	76720
Map resolution (Å)	3.56
FSC threshold	0.143
Refinement
Initial model used (PDB code)
Model resolution (Å)
FSC threshold
Map sharpening B factor (Å2)	-84.7
Model composition
Non-hydrogen atoms
Protein residues
Ligands
B factors (Å2)
Protein
Ligand
R.m.s. deviations
Bond lengths (Å)
Bond angles (°)
Validation
MolProbity score
Clashscore
Poor rotamers (%)
Ramachandran plot
Favored (%)
Allowed (%)
Disallowed (%)

## Sheet: BA.1-S 2196-S93Y IgG
	BA.1-S/2196-S93Y IgG Global	BA.1-S/2196-S93Y IgG Local
	(EMD-77340)	(EMD-77341)
		(PDB 36AY)
Data collection and processing
Magnification	105000	105000
Voltage (kV)	300	300
Electron exposure (e–/Å2)	56.7	56.7
Defocus range (μm)	0.5-2.5	0.5-2.5
Pixel size (Å)	1.054	1.054
Symmetry imposed	C1	C1
Initial particle images (no.)	2944180	2944180
Final particle images (no.)	641855	641855
Map resolution (Å)	2.8	3.1
FSC threshold	0.143	0.143
Refinement
Initial model used (PDB code)		8D8Q
Model resolution (Å)		3.2
FSC threshold		0.5
Map sharpening B factor (Å2)	-92.8	-71.5
Model composition
Non-hydrogen atoms		3353
Protein residues		425
Ligands		NAG: 1
B factors (Å2)
Protein		61.54
Ligand		96.88
R.m.s. deviations
Bond lengths (Å)		0.010 (0)
Bond angles (°)		1.727 (3)
Validation
MolProbity score		0.74
Clashscore		0.61
Poor rotamers (%)		0
Ramachandran plot
Favored (%)		97.85
Allowed (%)		2.15
Disallowed (%)		0

## Sheet: BA.1-S 2196-G50L-S93F IgG
	BA.1-S/2196-G50L-S93F IgG Global	BA.1-S/2196-G50L-S93F IgG Local
	(EMD-77342)	(EMD-77349)
		(PDB 36BC)
Data collection and processing
Magnification	105000	105000
Voltage (kV)	300	300
Electron exposure (e–/Å2)	54.8	54.8
Defocus range (μm)	0.5-2.5	0.5-2.5
Pixel size (Å)	1.054	1.054
Symmetry imposed	C1	C1
Initial particle images (no.)	1041811	1041811
Final particle images (no.)	56544	56544
Map resolution (Å)	3.6	3.6
FSC threshold	0.143	0.143
Refinement
Initial model used (PDB code)		8D8Q
Model resolution (Å)		3.9
FSC threshold		0.5
Map sharpening B factor (Å2)	-68.6	-92.2
Model composition
Non-hydrogen atoms		3356
Protein residues		425
Ligands		NAG: 1
B factors (Å2)
Protein		101.61
Ligand		180.37
R.m.s. deviations
Bond lengths (Å)		0.014 (0)
Bond angles (°)		1.221 (1)
Validation
MolProbity score		0.9
Clashscore		1.37
Poor rotamers (%)		0
Ramachandran plot
Favored (%)		97.84
Allowed (%)		1.92
Disallowed (%)		0.24

## Sheet: BA.1-S 2196-S93Y 2130WT
	BA.1-S/2196-S93Y/2130WT Global	BA.1-S/2196-S93Y/2130WT Local
	(EMD-77343)	(EMD-77344)
		(PDB 36AZ)
Data collection and processing
Magnification	105000	105000
Voltage (kV)	300	300
Electron exposure (e–/Å2)	58.6	58.6
Defocus range (μm)	0.5-2.5	0.5-2.5
Pixel size (Å)	1.054	1.054
Symmetry imposed	C1	C1
Initial particle images (no.)	1821815	1821815
Final particle images (no.)	243248	243248
Map resolution (Å)	3.1	3.9
FSC threshold	0.143	0.143
Refinement
Initial model used (PDB code)		8D8Q
Model resolution (Å)		4.1
FSC threshold		0.5
Map sharpening B factor (Å2)	-86.6	-142.5
Model composition
Non-hydrogen atoms		5234
Protein residues		669
Ligands		NAG: 1
B factors (Å2)
Protein		96.18
Ligand		142.45
R.m.s. deviations
Bond lengths (Å)		0.001 (0)
Bond angles (°)		1.092 (1)
Validation
MolProbity score		0.96
Clashscore		0.88
Poor rotamers (%)		0.35
Ramachandran plot
Favored (%)		96.81
Allowed (%)		2.73
Disallowed (%)		0.46

## Sheet: BA.1-S 2196-G50L-S93F 2130-S30B
	BA.1-S/2196-G50L-S93F/2130-S30BG Global	BA.1-S/2196-G50L-S93F/2130-S30BG Local
	(EMD-77345)	(EMD-77346)
		(PDB 36BA)
Data collection and processing
Magnification	105000	105000
Voltage (kV)	300	300
Electron exposure (e–/Å2)	55	55
Defocus range (μm)	0.5-2.5	0.5-2.5
Pixel size (Å)	1.054	1.054
Symmetry imposed	C1	C1
Initial particle images (no.)	911438	911438
Final particle images (no.)	71682	71682
Map resolution (Å)	3.6	4.3
FSC threshold	0.143	0.143
Refinement
Initial model used (PDB code)		8D8Q
Model resolution (Å)		4.2
FSC threshold		0.5
Map sharpening B factor (Å2)	-69.1	-159
Model composition
Non-hydrogen atoms		5235
Protein residues		669
Ligands		NAG: 1
B factors (Å2)
Protein		107.46
Ligand		127.11
R.m.s. deviations
Bond lengths (Å)		0.011 (0)
Bond angles (°)		1.099 (0)
Validation
MolProbity score		0.81
Clashscore		1.07
Poor rotamers (%)		0.18
Ramachandran plot
Favored (%)		98.48
Allowed (%)		1.52
Disallowed (%)		0

## Sheet: BA.4-S Ab#10-M30W-S94M IgG
	BA.4-S/Ab#10-M30W-S94M IgG Global	BA.4-S/Ab#10-M30W-S94M IgG Local
	(EMD-77347)	(EMD-77348)
		(PDB 36BB)
Data collection and processing
Magnification	105000	105000
Voltage (kV)	300	300
Electron exposure (e–/Å2)	49.3	49.3
Defocus range (μm)	0.5-2.5	0.5-2.5
Pixel size (Å)	1.054	1.054
Symmetry imposed	C1	C1
Initial particle images (no.)	6537563	6537563
Final particle images (no.)	536554	536554
Map resolution (Å)	3.1	3.6
FSC threshold	0.143	0.143
Refinement
Initial model used (PDB code)		8D8Q
Model resolution (Å)		6.4
FSC threshold		0.5
Map sharpening B factor (Å2)	-110.5	-239.7
Model composition
Non-hydrogen atoms		3292
Protein residues		418
Ligands		NAG: 1
B factors (Å2)
Protein		183.47
Ligand
R.m.s. deviations
Bond lengths (Å)		0.010 (4)
Bond angles (°)		1.245 (1)
Validation
MolProbity score		1.67
Clashscore		7.6
Poor rotamers (%)		0
Ramachandran plot
Favored (%)		96.59
Allowed (%)		3.41
Disallowed (%)		0
