# Supplementary material for: Structure-Guided Design of Therapeutic Antibodies Targeting SARS-CoV-2 Omicron Variants
Source: Research Square preprint supplement (doi:10.21203/rs.3.rs-9917568/v1), 2026-06-24
Supplement: Supplementary file 1 [file d688b4c2bd5b69ce0658db6f.pdf]

# **Structure-Guided Design of Therapeutic Antibodies Targeting SARS-CoV-2 Omicron Variants**

Jianqiu Du<sup>1</sup>, Yuanhan Wu<sup>1,2</sup>, Sukanya Ghosh<sup>1</sup>, Kelly Bayruns<sup>1</sup>, Roopak Sadeesh<sup>1</sup>, David B.  
Weiner<sup>1</sup> and Jesper Pallesen<sup>1\*</sup>

<sup>1</sup> *Vaccine and Immunotherapy Center, The Wistar Institute, Philadelphia, PA 19104, US.*

<sup>2</sup> *Department of Bioengineering, University of Pennsylvania, PA 19104, US.*

\* Corresponding author: Jesper Pallesen

**Email:** [jpallesen@wistar.org](mailto:jpallesen@wistar.org)

**Extended Data**

**a**

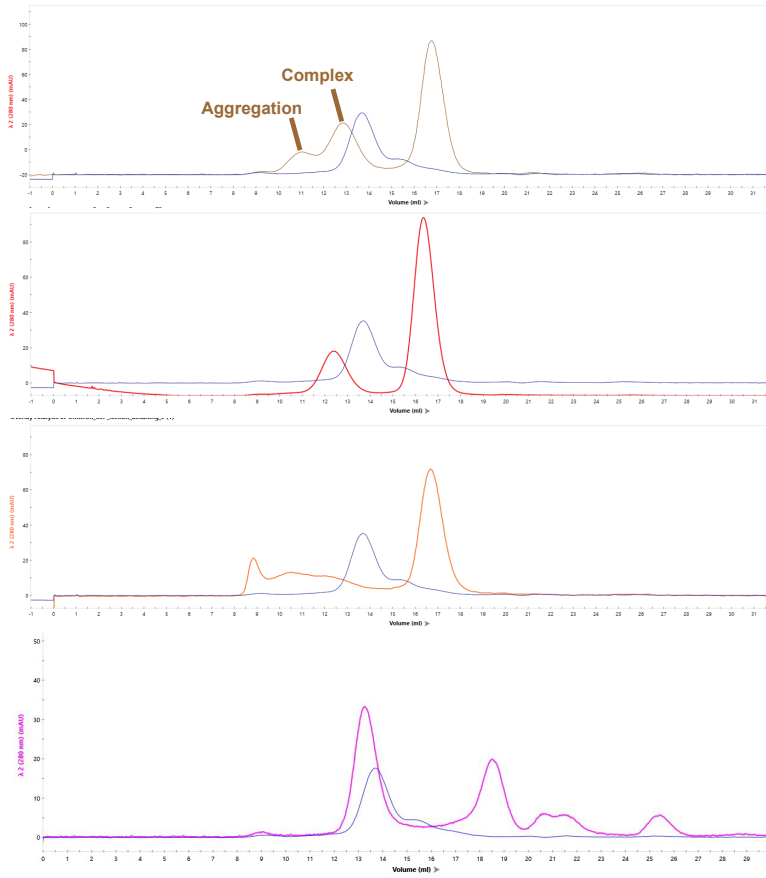

BA.1-S/2130WT IgG

BA.1-S

BA.1-S/2196WT IgG

BA.1-S

BA.1-S/2196 IgG/2130 IgG

BA.1-S

BA.1-S/2130WT/2196WT Fabs

BA.1-S

**b**

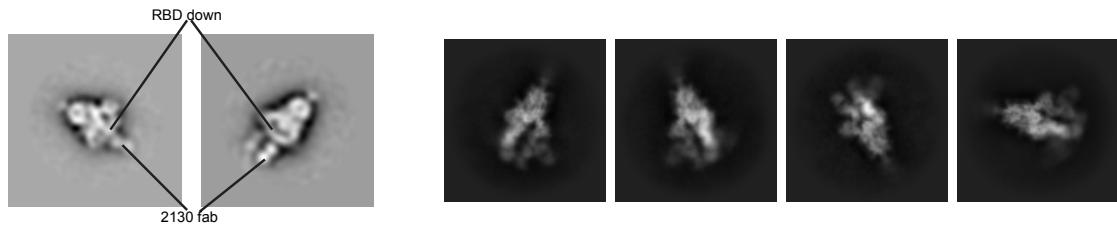

**c**

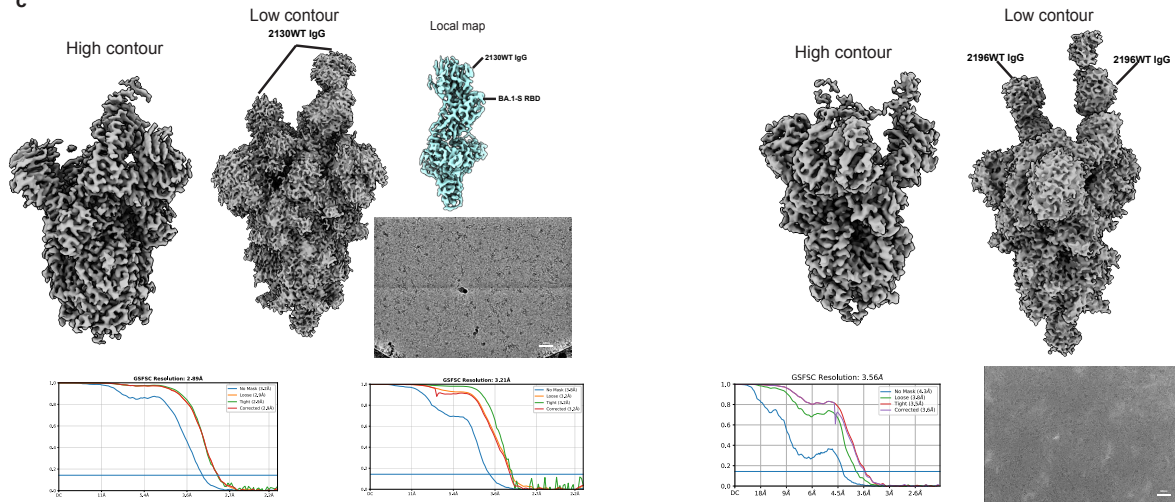

**Extended Data Fig. 1 | 2130 and 2196 antibody interaction with BA.1-S. a. Size Exclusion**

Chromatography (SEC) analysis of BA.1-S binding to 2196WT fab or IgG with or without 2130WT fab

or IgG. SEC traces of each complex are colored as indicated. **b.** Left panel: Representative ns-EM 2D

class averages of BA.1-S/2130Fab/2196Fab complex. 2D classes show only 2130 fab binding to BA.1-S.

Right panel: cryo-EM2D class averages of WA-S/2130/2196 fab for comparison. **c.** Left panel: global and

local density maps of BA.1-S/2130WT IgG and corresponding FSC curves. Right panel: global density

map of BA.1-S/2196WT IgG and corresponding FSC curve.

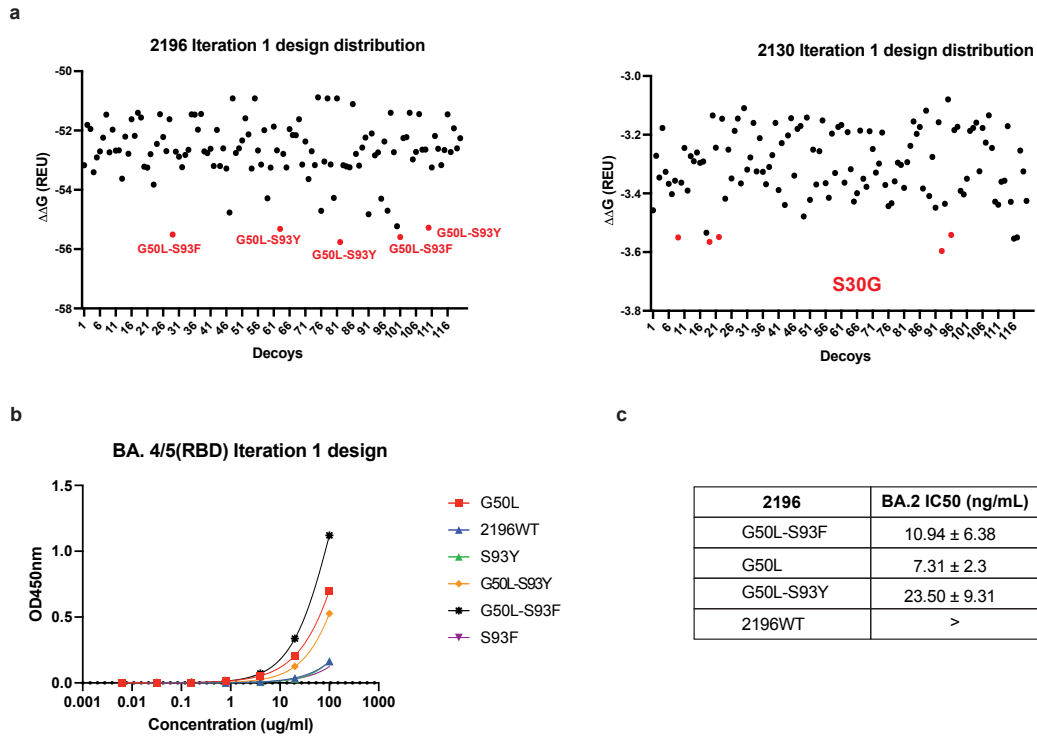

**Extended Data Fig. 2 | Iteration 1 design supplemental data.** a. The  $\Delta\Delta G$  distribution of decoys from Iteration 1 design on 2196 and 2130. Selected designs are colored in red and labeled. b. ELISA binding of Iteration 1 designed antibodies against BA.4/5 RBD. Each curve and data point are colored as shown in legend. Curves represent a four-parameter logistic regression model fitted in GraphPad Prism with two replicates. c. Half-maximal inhibitory concentration (IC<sub>50</sub>) of neutralization of Iteration 1 designed antibody against BA.2 pseudovirus.

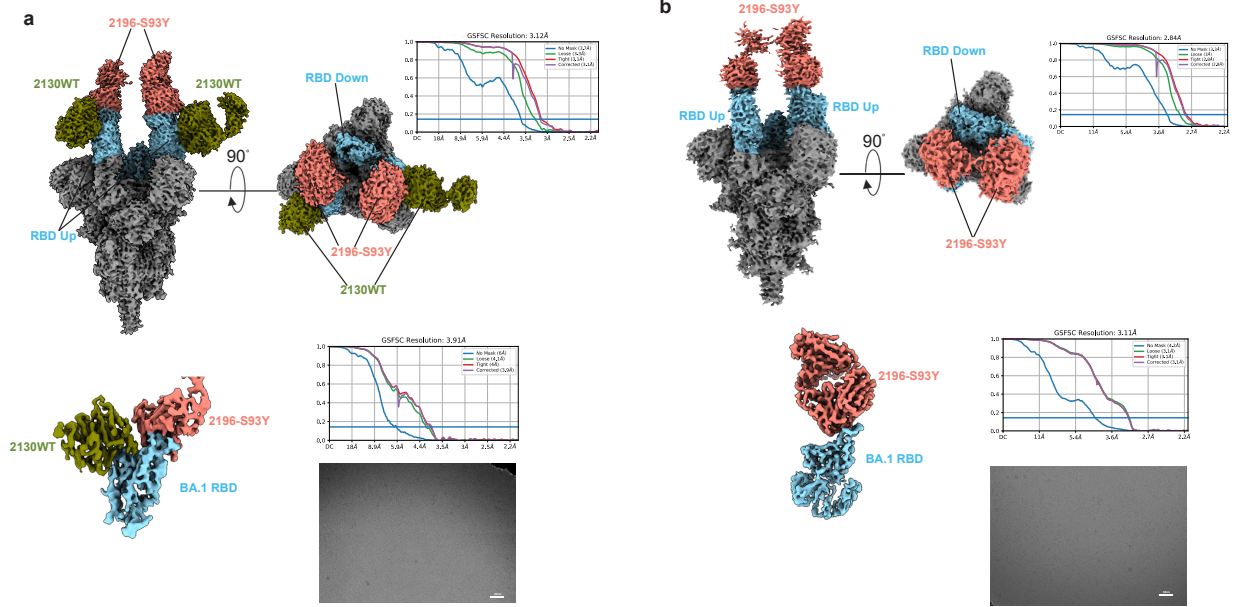

**Extended Data Fig. 3 | Cryo-EM density maps of other two antibodies from Iteration 1 design in complex with BA.1-S. a.** Global density map of BA.1-S/2196-S93Y/2130WT and local density map of BA.1-RBD/2196-S93Y/2130WT. **b.** Global density map of BA.1-S/2196-S93Y and local density map of BA.1-RBD/2196-S93Y. Corresponding FSC curves are next to the density maps.

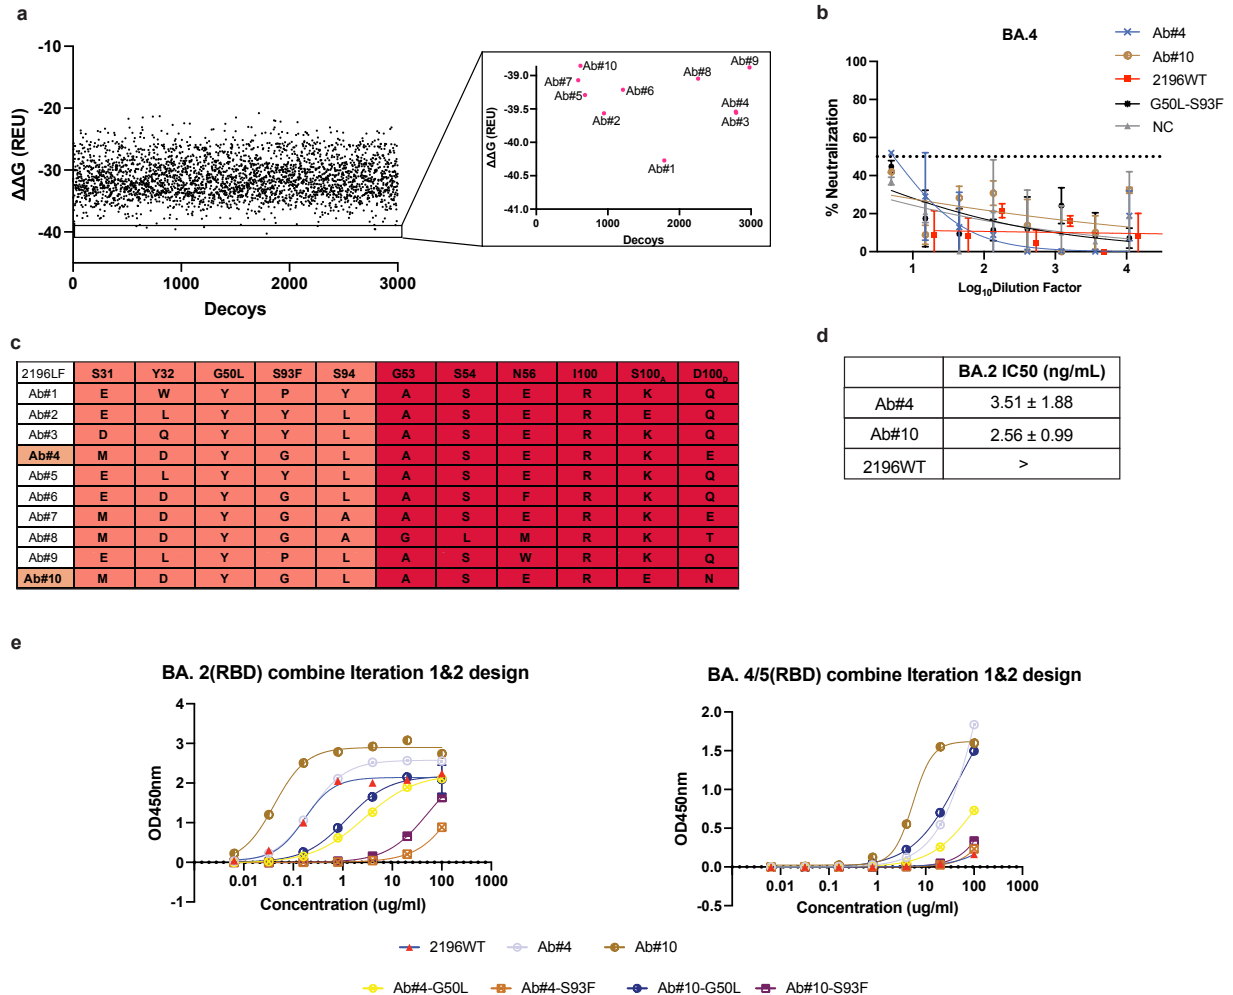

**Extended Data Fig. 4 | Iteration 2 design supplementary data.** **a.**  $\Delta\Delta G$  values of Iteration 2 decoys. Zoom-in view shows scoring of our selected top 10 candidates. The selected candidates are indicated in red. **b.** Pseudoviral neutralization of Ab#4 and Ab#10 against BA.2 or BA.4 pseudoviruses. Curves represent a four-parameter logistic regression model fitted in GraphPad Prism with two replicates. Neutralization data has been repeated in 3 assays. **c.** Chart shows mutated residues of designed positions of the 10 candidates. Light chain positions are shown in salmon and heavy chain positions are shown in red. Ab#4 and Ab#10 are highlighted in light brown. **d.** IC<sub>50</sub> values of Ab#4 and Ab#10 neutralizing of BA.2 pseudovirus. **e.** ELISA binding of antibodies from Iterations 1 and 2 combined designs against BA.1/2 RBD. Each curve and data point are labeled as described in legend.

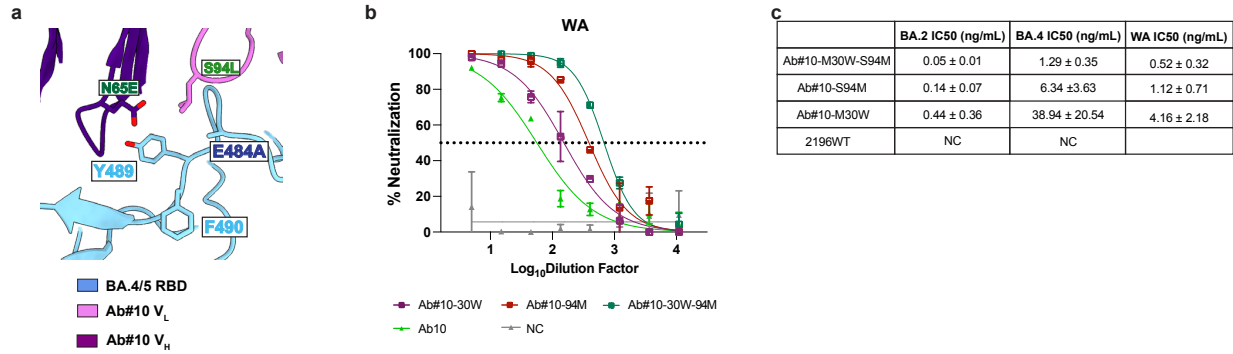

**Extended Data Fig. 5 | Iteration 3 design supplementary data. a.** We identified the S94L position on the BA.4-RBD/Ab#10 model as an additional design opportunity. **b.** Pseudoviral neutralization of selected Iteration 3 designed antibodies against WA pseudovirus. Curves represent a four-parameter logistic regression model fitted in GraphPad Prism with two replicates. Neutralization data has been repeated in 3 assays. **c.** IC50 values of Iteration 3 designed antibodies against BA.2, BA.4 and WA pseudoviruses.

**a**  
General Data Processing Scheme

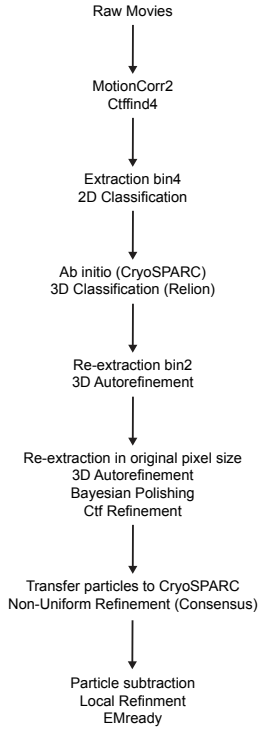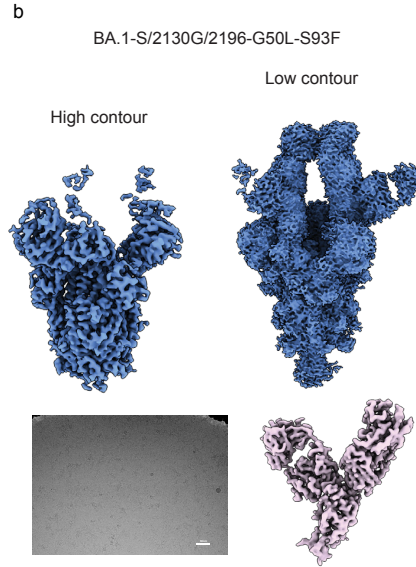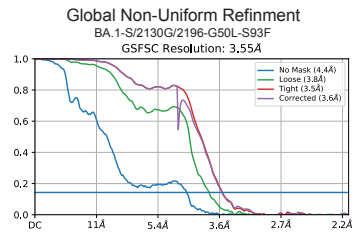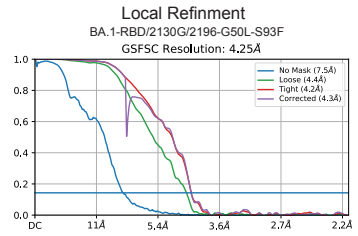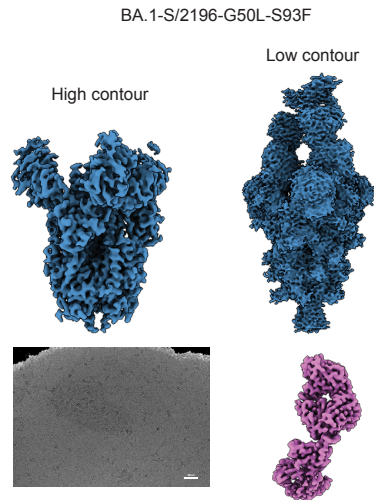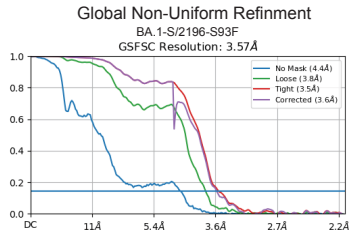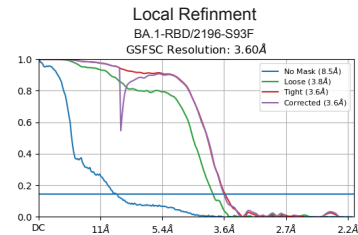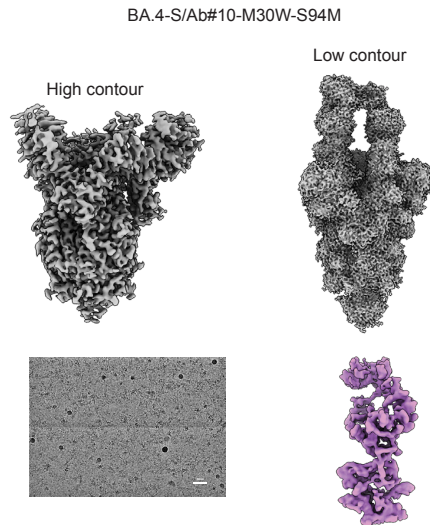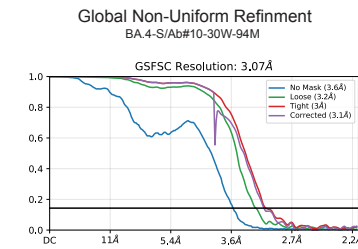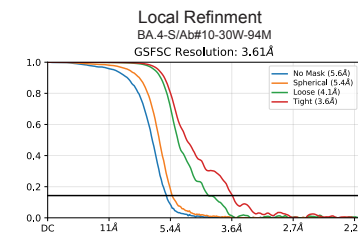

**Extended Data Fig. 6 | Cryo-EM data processing scheme and additional density maps.** **a.** General data processing scheme. **b.** BA.1-S/2196-G50L-S93F/2130-S30<sub>B</sub>G, BA.1-S/2106-S93F and BA.4-S/Ab#10-M30W-L94M global density maps, local density maps and corresponding GSFSC curve plots.
